# Supplementary material for: In the Absence of a TCR Signal IL-2/IL-12/18-Stimulated γδ T Cells Demonstrate Potent Anti-Tumoral Function Through Direct Killing and Senescence Induction in Cancer Cells
Source: MDPI journal article supplement (doi:10.3390/cancers12010130), 2020-01-04
Supplement: s1 [file s1]

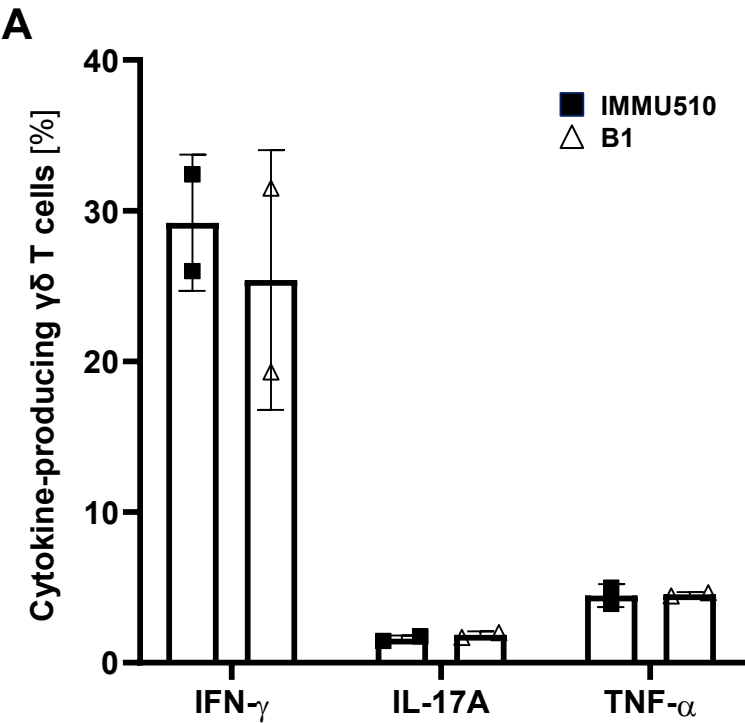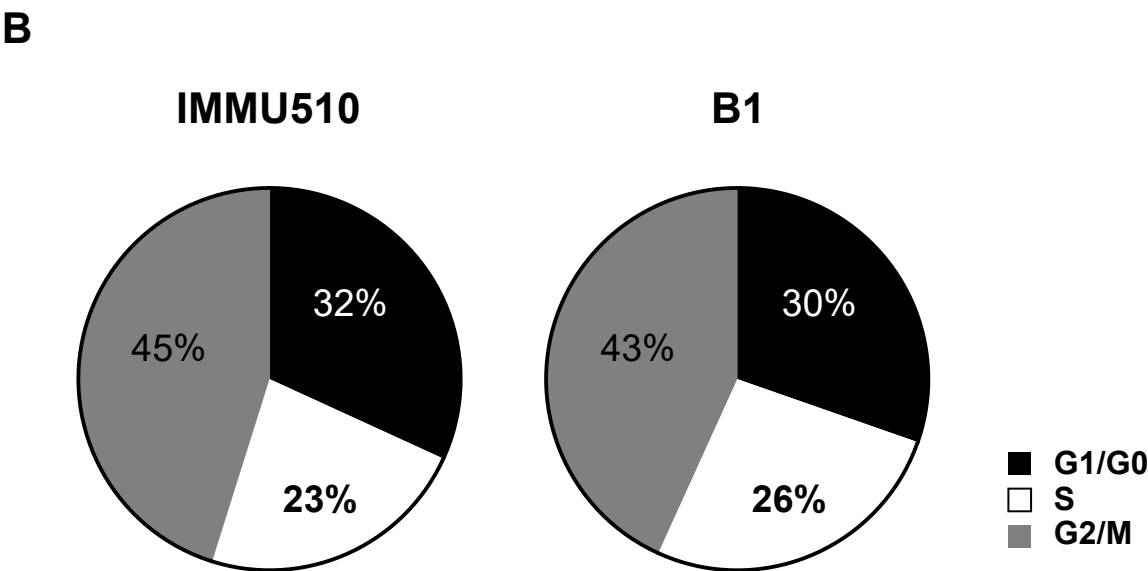

**Supplementary Figure 1. Direct comparison of two different anti- $\gamma\delta$ TCR monoclonal antibodies, clone IMMU510 and clone B1.** (A) isolated  $\gamma\delta$  T cells were stimulated with either IMMU510 or B1 together with IL-2/IL-12/IL-18. The frequencies of IFN- $\gamma^+$ , IL-17A $^+$ , and TNF- $\alpha^+$   $\gamma\delta$  T cells were analyzed by flow cytometry. The data were obtained from 2 different healthy donors. (B) isolated  $\gamma\delta$  T cells were stimulated with either IMMU510 or B1 together with IL-2/IL-12/IL-18. These cells were co-cultured with Wm115 cells for 96 hours and cell cycle status of the tumor cells was evaluated by EdU-incorporation assay. Representative data from one donor are shown.
